# Supplementary material
Source: Royal Society of Chemistry journal article supplement (https://www.rsc.org/suppdata/dt/1999/2269/903779i.doc)
Supplement: Supplementary file 1 [file 903779i.doc]

**Systematic synthesis and photochemistry of tetraaryl porphyrins mono-substituted with a transition metal carbonyl: characterisation of a zinc porphyrin-rhenium carbonyl complex**

**Catherine J. Aspley, John R. Lindsay Smith and Robin N. Perutz***

*Department of Chemistry, University of York, Heslington, York, YO10 5DD, UK*

**Supplementary Information:**

Data for zinc porphyrin **2**: (Found: C, 74.90; H, 4.26; N, 10.36. C56H37N7OZn requires C, 75.38; H, 4.18; N, 10.99%) UV-Vis max/nm (pyridine) 409 (sh, /dm3 mol1 cm1 53 400), 429 (Soret, 762 000), 524 (Q3, 4 340), 562 (Q2, 22 900) and 602 (Q1, 14 100).

1H NMR (300 MHz; solvent [2H8]THF; referenced to [2H8]THF at  3.7)  10.38 (1 H, s, amide NH), 9.25 (1 H, d, *J* 1.1 Hz, bpya), 9.08 (2 H, d, *J* 4.5 Hz, -pyrrole) 8.99 (2 H, d, *J* 4.5 Hz, -pyrrole), 8.97 (4 H, s, -pyrrole), 8.70 (1 H, d, *J* 5.20 Hz, bpyb), 8.59 (1 H, s, bpyc), 8.42 (2 H, d, *J* 8.46 Hz, bridging phenyld), 8.34 (8 H, m, six *o-*phenyl and two bridging phenyl protons), 8.10 (1 H, dd, *J* 4.8 Hz, *J* 1.8 Hz, bpye), 7.86 (9 H, m, *m/p*-phenyl), 7.35 (1 H, d, *J* 5.88 Hz, bpyf), 2.60 (3 H, s, bpy CH3) One bpy resonance is not observed. 1H NMR (500 MHz; solvent [2H5]pyridine; referenced to  7.1)  11.84 (1 H, s, amide NH), 9.48 (1 H, s, bpy), 9.20 (2 H, d, *J* 4.5 Hz, -pyrrole), 9.09 (2 H, d, *J* 4.5 Hz, -pyrrole), 9.06 (4 H, s, -pyrrole), 8.86 (1 H, d, *J* 4.9 Hz, bpy), 8.54 (1 H, d, *J* 4.9 Hz, bpy), 8.50 (2 H, d, *J* 7.9 Hz, bridging phenyl), 8.43 (1 H, s, bpy), 8.36 (2 H, d, *J* 7.9 Hz, bridging phenyl), 8.30 (6 H, s, *o-*phenyl), 8.14 (1 H, d, *J* 4.3 Hz, bpy), 7.68 (9 H, m, *m/p*-phenyl), 7.01 (1 H, d, *J* 2.5 Hz, bpy), 2.15 (3 H, s, bpy CH3).

13C NMR, DEPT 90 and 1H-13C HETCOR (126 MHz; solvent [2H8]THF; referenced to [2H8]THF at  68.6)  166.38 (amide CO), 159.17 (C), 157.57 (C), 152.40 (C), 152.21 (C), 151.83 (CH, -pyrrole), 151.02 (CH, bpyb), 150.05 (C), 146.17 (C), 145.80 (C), 141.30 (C), 141.01 (C), 136.86 (CH, *o*-phenyl), 136.57 (CH, *o*-phenyl), 133.41 (CH, -pyrrole), 129.29 (CH, *m/p*-phenyl), 128.37 (CH, *m/p*-phenyl), 127.02 (CH, bpyf), 123.92 (CH, bpye), 123.74 (CH, bpyc), 122.69 (C), 122.64 (C), 122.48 (C), 120.14 (CH, bpya), 120.04 (CH, bridging phenyld), 22.38 (bpy CH3). 1H and 13C NMR resonances marked with a-f are correlated in the 2-D 1H-13C HETCOR spectrum.

FAB-MS (NOBA matrix): 888 (100, M+H+). HR-FAB: For C56H37N7OZn the calculated mass is 887.23511. Actual mass is 887.23598.  0.9 mDa.
